# Supplementary material
Source: Springer Nature journal article supplement (https://www.springermedizin.de/resource/supplementary/13054_2009_7623_MOESM1_ESM.pdf/9730172)

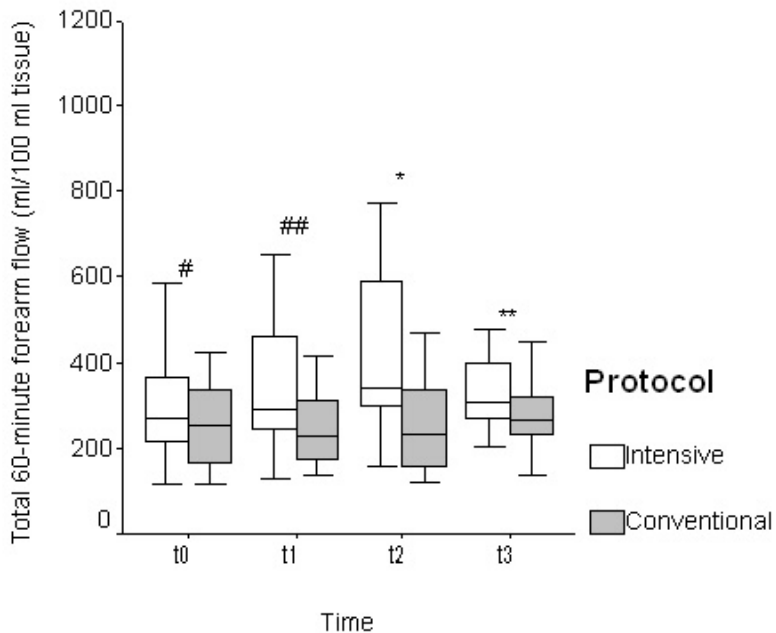

Supplement: MOESM1 [file 9730172]
